# Supplementary material
Source: MDPI journal article supplement (https://www.mdpi.com/2304-6740/7/6/73)
Supplement: s1 [file s1]

Article

# Supplementary Information - Determination of $pK_a$ Values via *ab initio* Molecular Dynamics and its Application to Transition Metal Based Water Oxidation Catalysts

Mauro Schilling<sup>1</sup>  and Sandra Luber<sup>1,\*</sup> <sup>1</sup> University of Zurich, Department of Chemistry, Winterthurerstrasse 190, CH-8057 Zurich

\* Correspondence: sandra.luber@chem.uzh.ch; Tel.: +41 44 63 544 64 (CH)

Version June 11, 2019 submitted to Inorganics

## 1. Ligand Structure

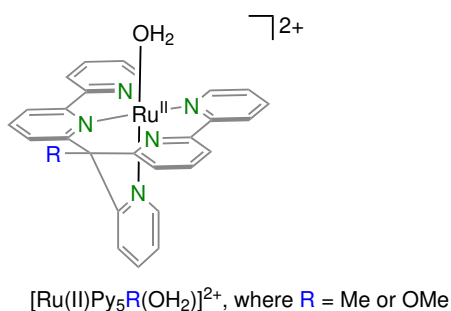

Figure S 1. Lewis structure of  $[Ru(II)Py_5R(H_2O)]^{2+}$ , where R = Me or OMe.

## 2. Potentials of Mean Force

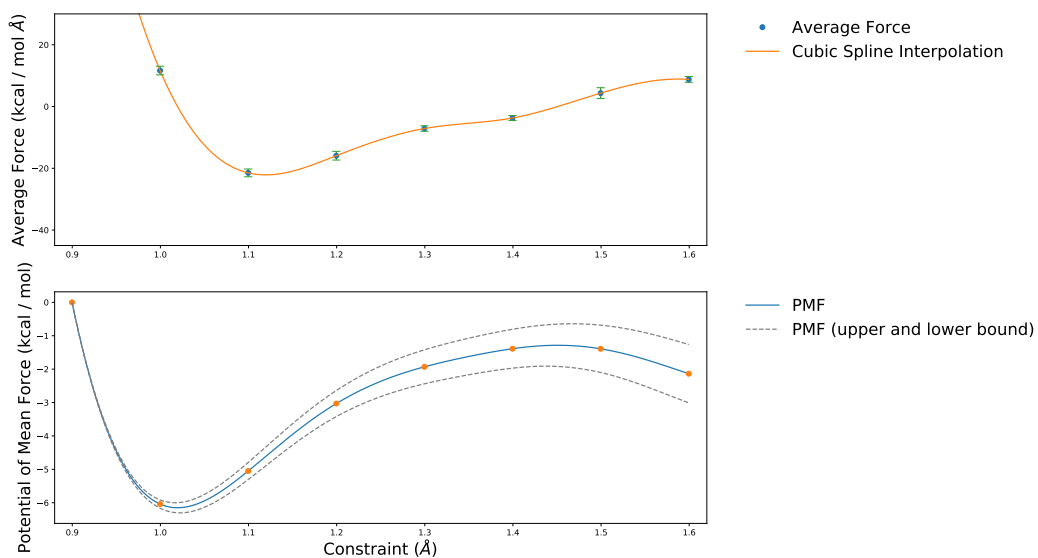

**Figure S 2.** Average force and PMF profile of HCOOH in a cubic box with a side length of 15.6406 Å.

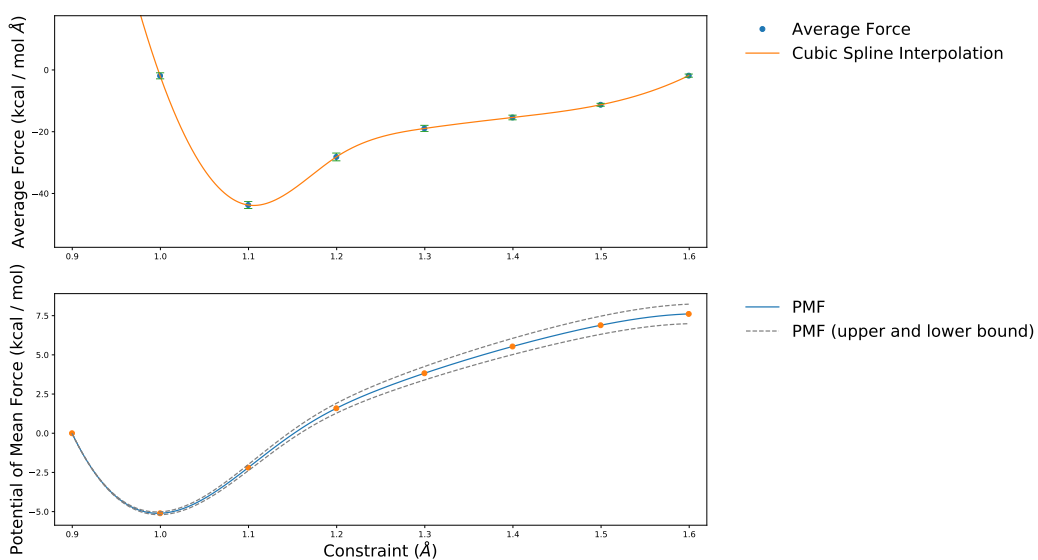

**Figure S 3.** Average force and PMF profile of PhOH in a cubic box with a side length of 15.6406 Å.

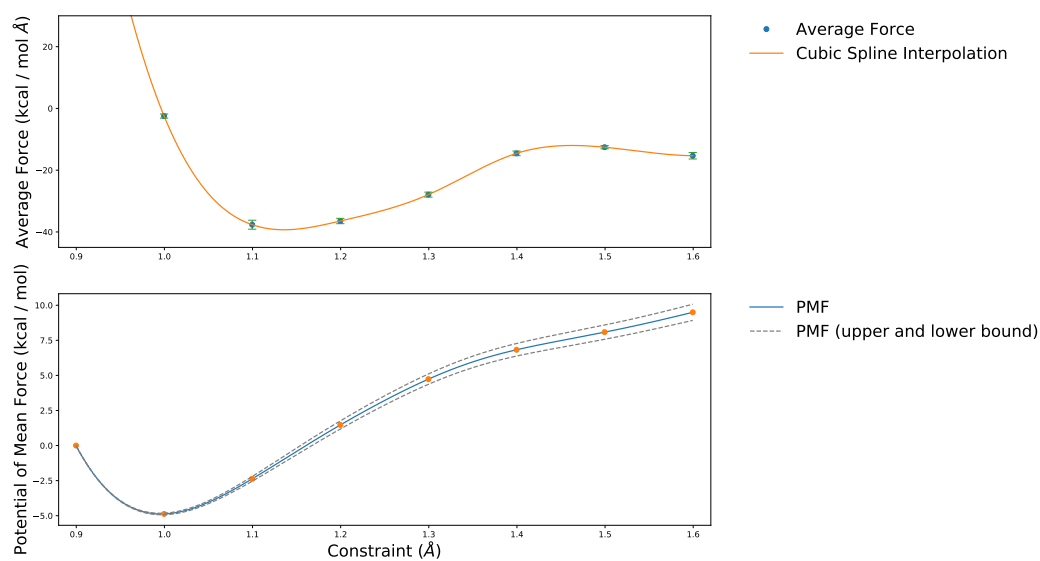

**Figure S 4.** Average force and PMF profile of  $[\text{Ru(II)Py}_5\text{Me(H}_2\text{O)}]^{2+}$  in a cubic box with a side length of 15.6406 Å.

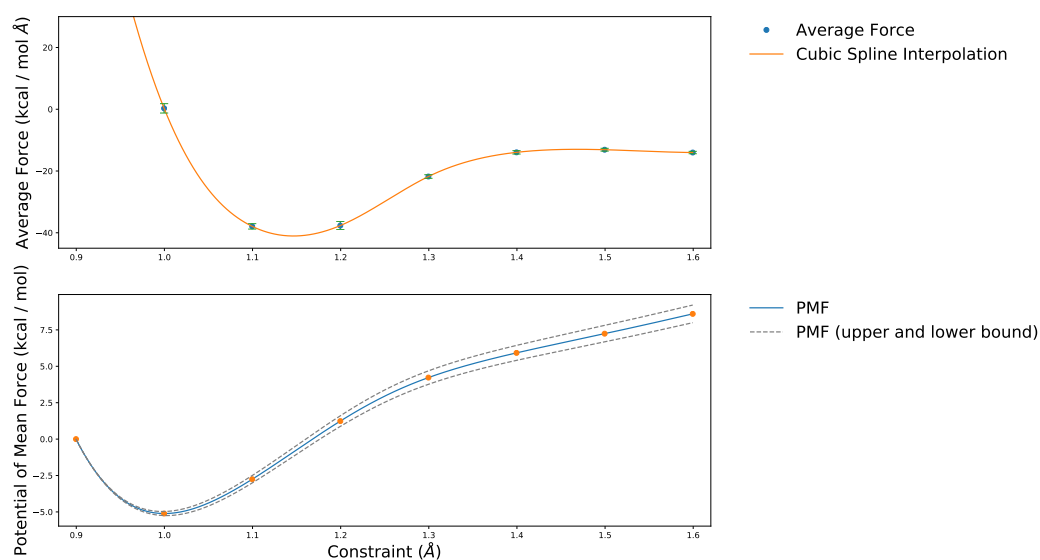

**Figure S 5.** Average force and PMF profile of  $[\text{Ru(II)Py}_5\text{OMe(H}_2\text{O)}]^{2+}$  in a cubic box with a side length of 15.6406 Å.

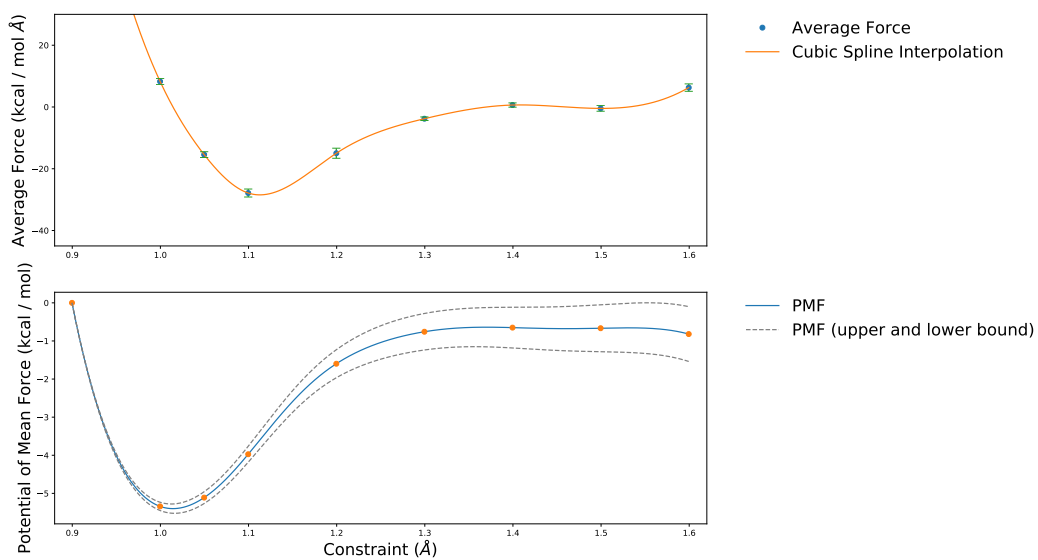

**Figure S 6.** Average force and PMF profile of  $[\text{Ru(III)Py}_5\text{OMe(H}_2\text{O)}]^{3+}$  in a cubic box with a side length of 15.6406 Å.

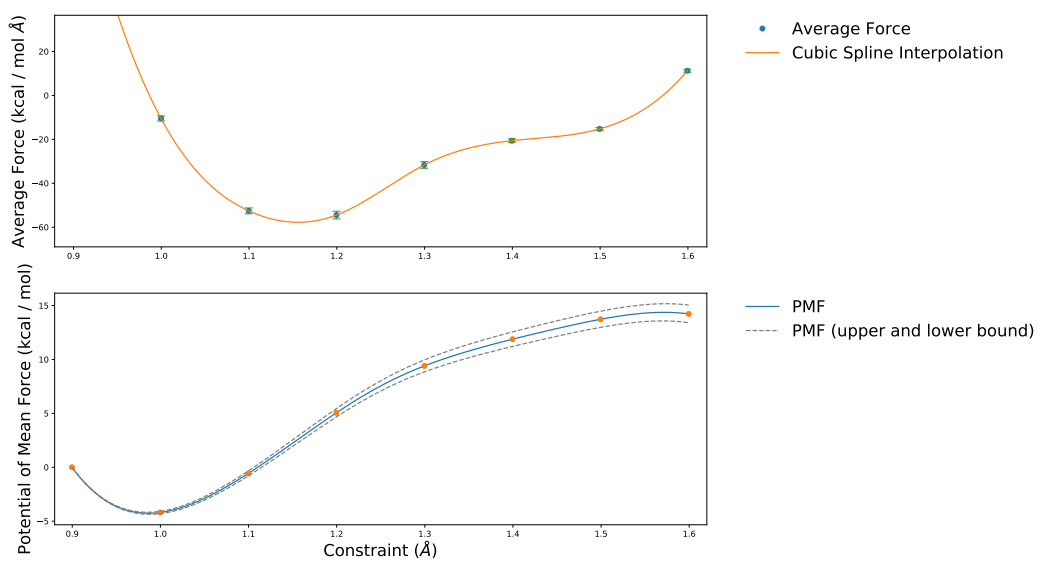

**Figure S 7.** Average force and PMF profile of water in a cubic box with a side length of 19.7340 Å.

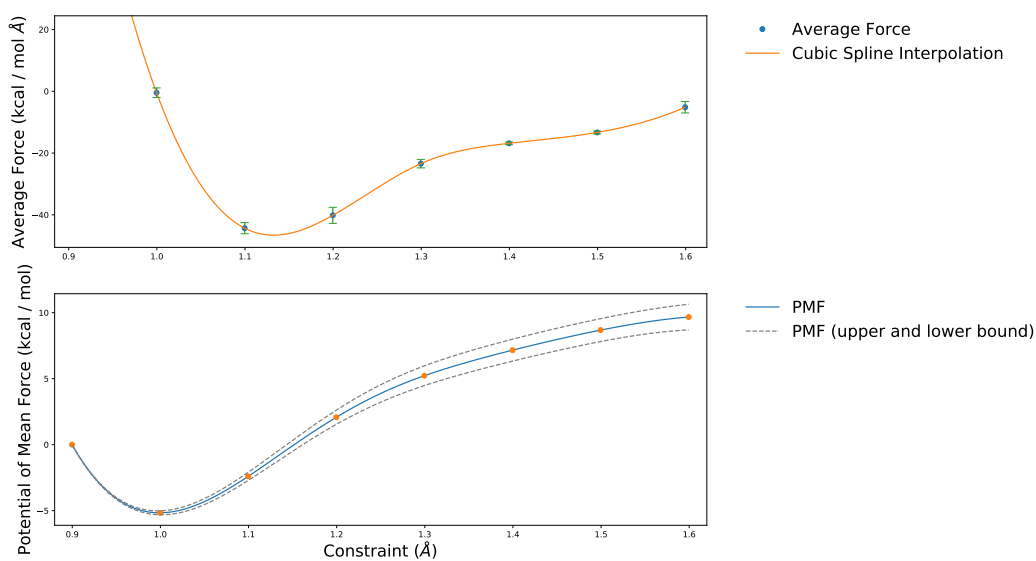

**Figure S 8.** Average force and PMF profile of  $[\text{Ru(II)Py}_5\text{OMe(H}_2\text{O)}]^{2+}$  in a cubic box with a side length of 19.7340 Å.

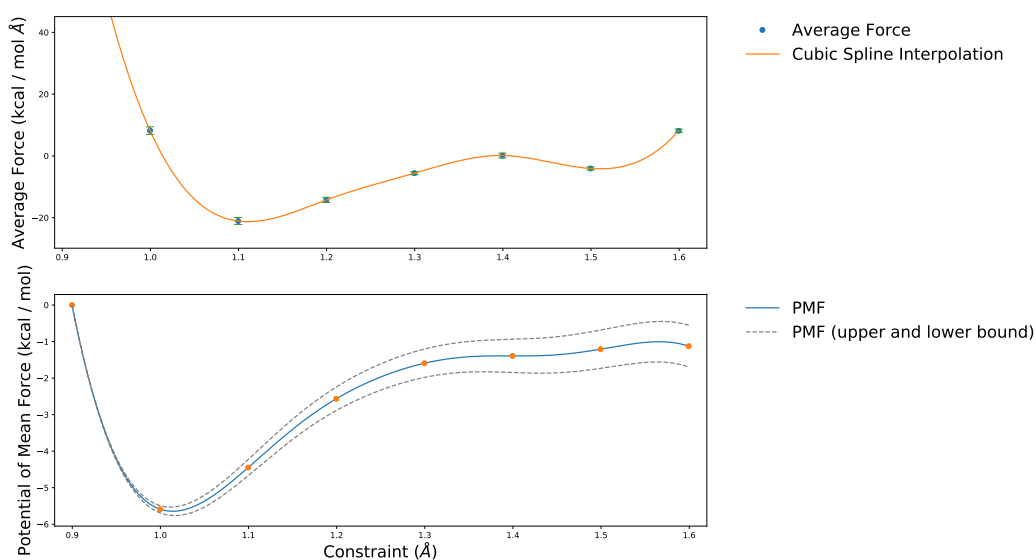

**Figure S 9.** Average force and PMF profile of  $[\text{Ru(III)Py}_5\text{OMe(H}_2\text{O)}]^{3+}$  in a cubic box with a side length of 19.7340 Å.

### 3. Absolute and probabilistic $pK_a$

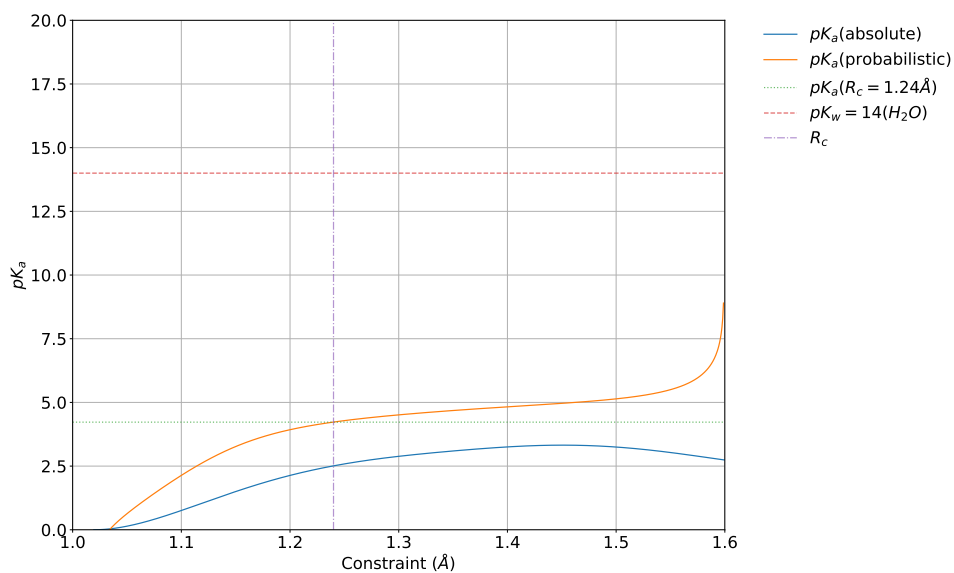

**Figure S 10.** Absolute and probabilistic  $pK_a$  calculated for HCOOH in a cubic box with a side length of 15.6406 Å.

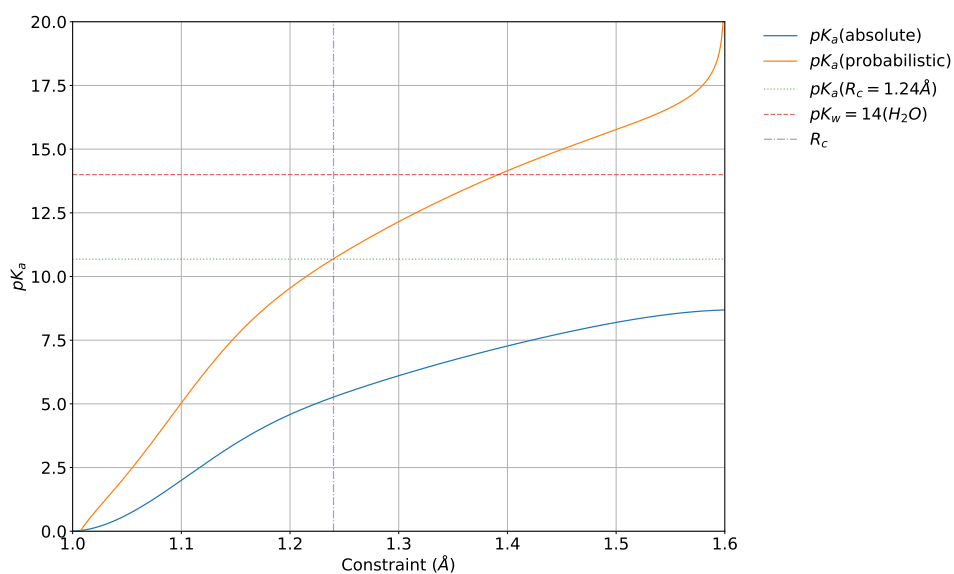

**Figure S 11.** Absolute and probabilistic  $pK_a$  calculated for PhOH in a cubic box with a side length of 15.6406 Å.

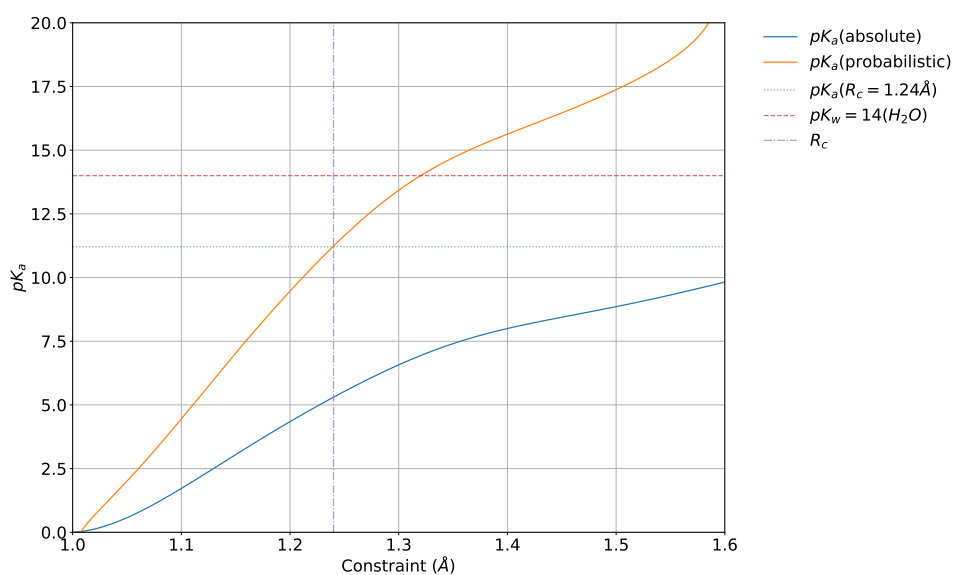

**Figure S 12.** Absolute and probabilistic  $pK_a$  calculated for  $[\text{Ru(II)Py}_5\text{Me(H}_2\text{O)}]^{2+}$  in a cubic box with a side length of 15.6406 Å.

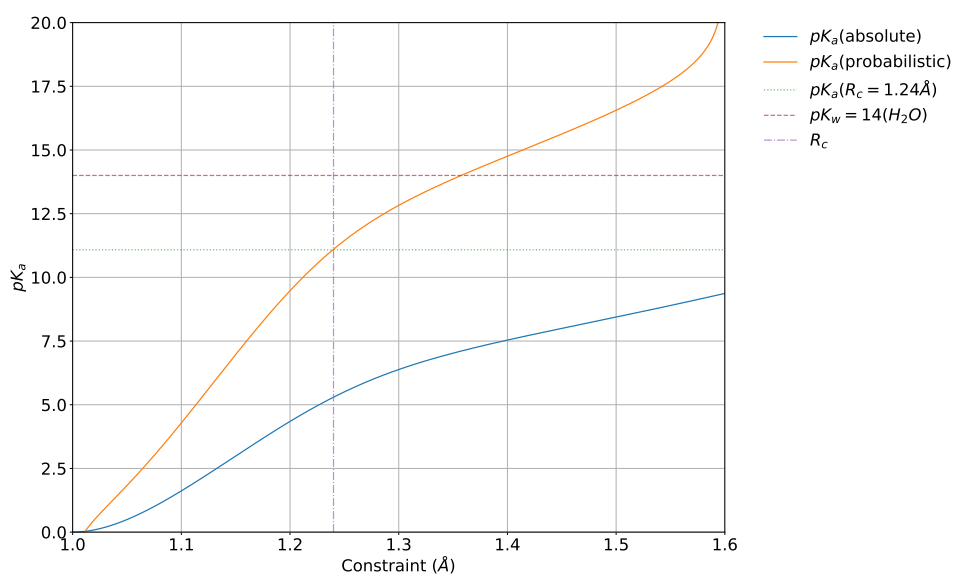

**Figure S 13.** Absolute and probabilistic  $pK_a$  calculated for  $[\text{Ru(II)Py}_5\text{OMe(H}_2\text{O)}]^{2+}$  in a cubic box with a side length of 15.6406 Å.

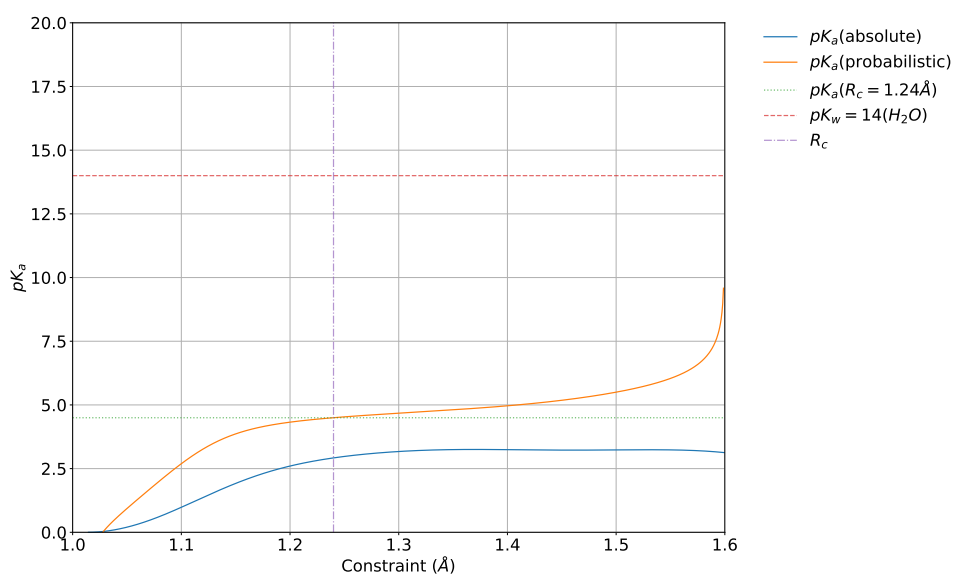

**Figure S 14.** Absolute and probabilistic  $pK_a$  calculated for  $[\text{Ru(III)Py}_5\text{OMe(H}_2\text{O)}]^{3+}$  in a cubic box with a side length of 15.6406 Å.

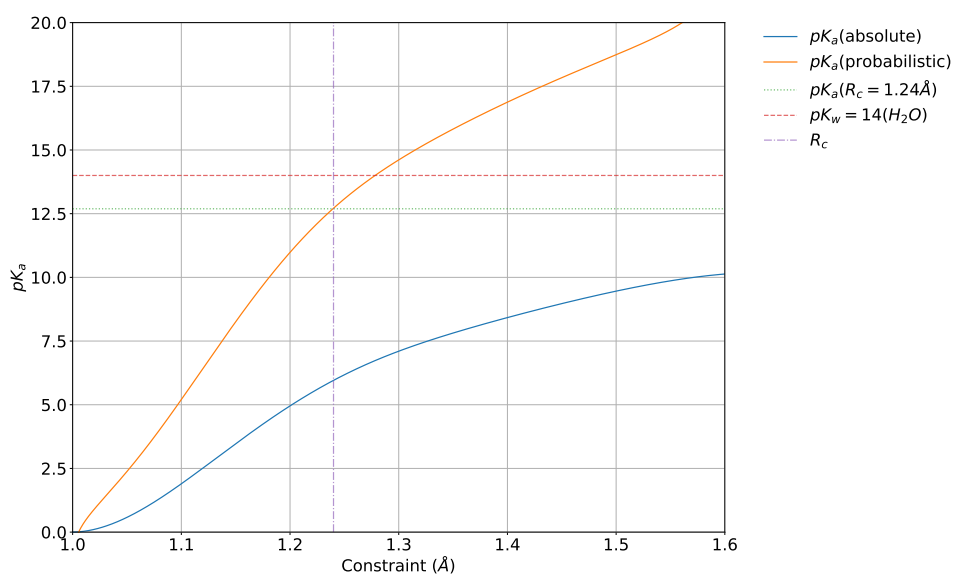

**Figure S 15.** Absolute and probabilistic  $pK_a$  calculated for  $[\text{Ru(II)Py}_5\text{OMe(H}_2\text{O)}]^{2+}$  in a cubic box with a side length of 19.7340 Å.



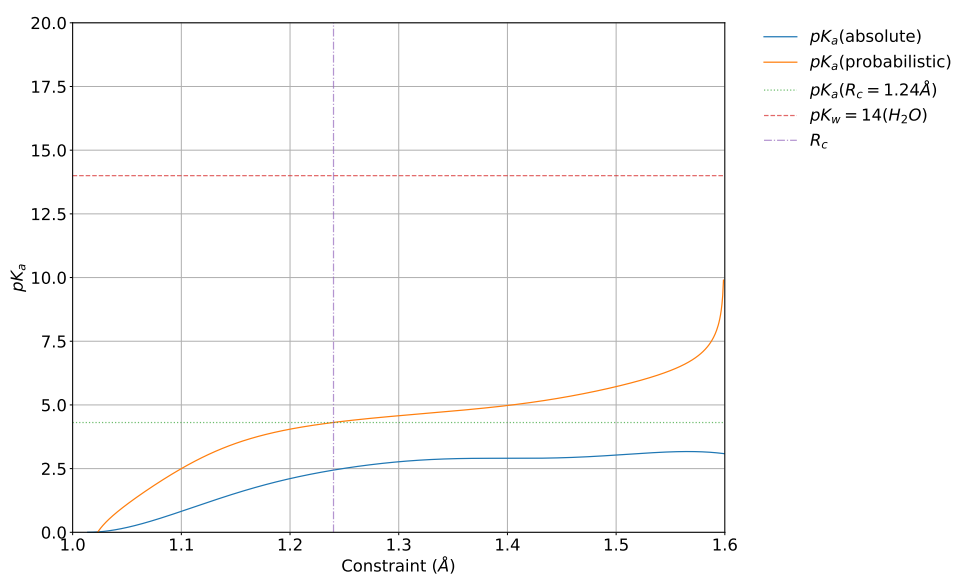

**Figure S 16.** Absolute and probabilistic  $pK_a$  calculated for  $[\text{Ru(III)Py}_5\text{OMe(H}_2\text{O)}]^{3+}$  in a cubic box with a side length of 19.7340 Å.

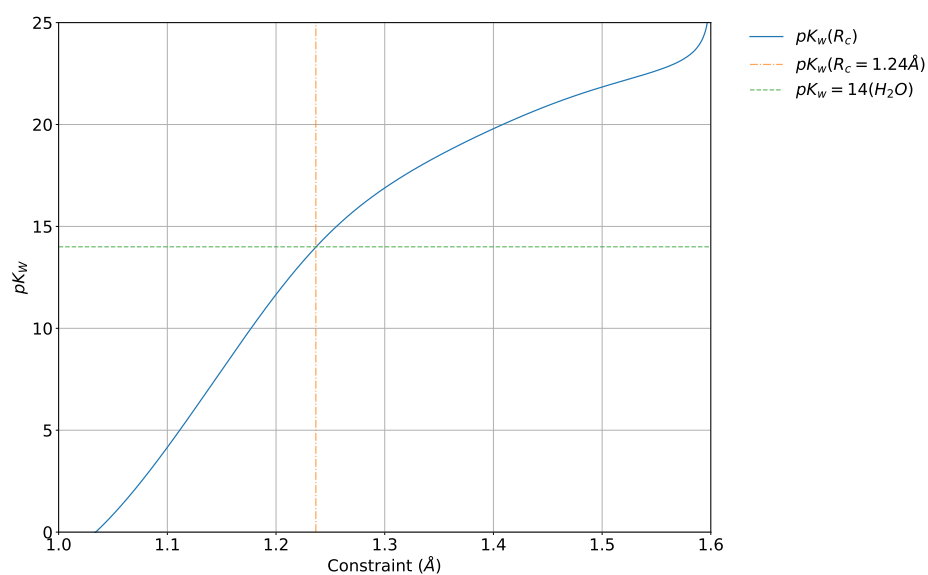

**Figure S 17.** Determination of  $R_c$  from the simulation of water, by fitting to the experimental value in box with a side length of 19.7340 Å.

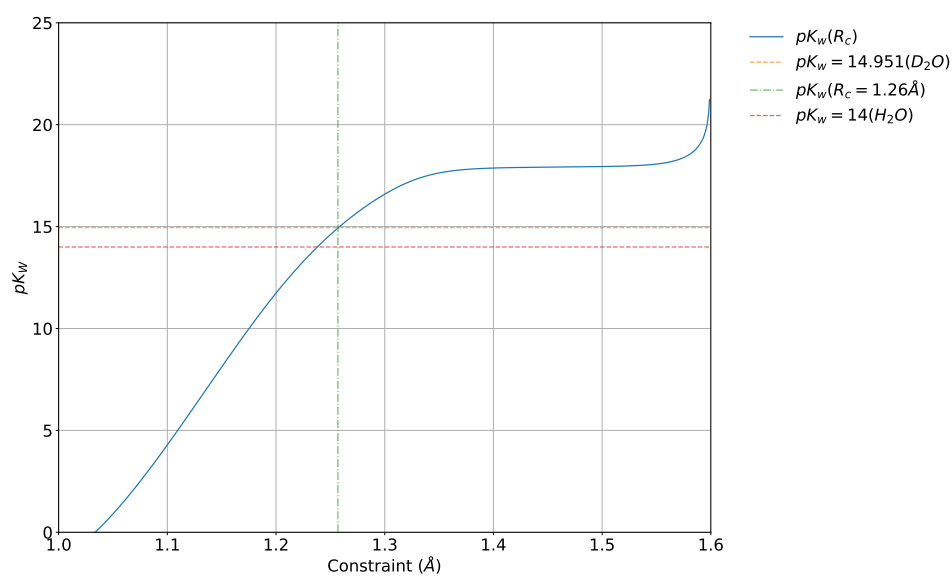

**Figure S 18.** Determination of  $R_c$  from the simulation of water, by fitting to the experimental value of  $D_2O$  in box with a side length of 15.6406 Å.

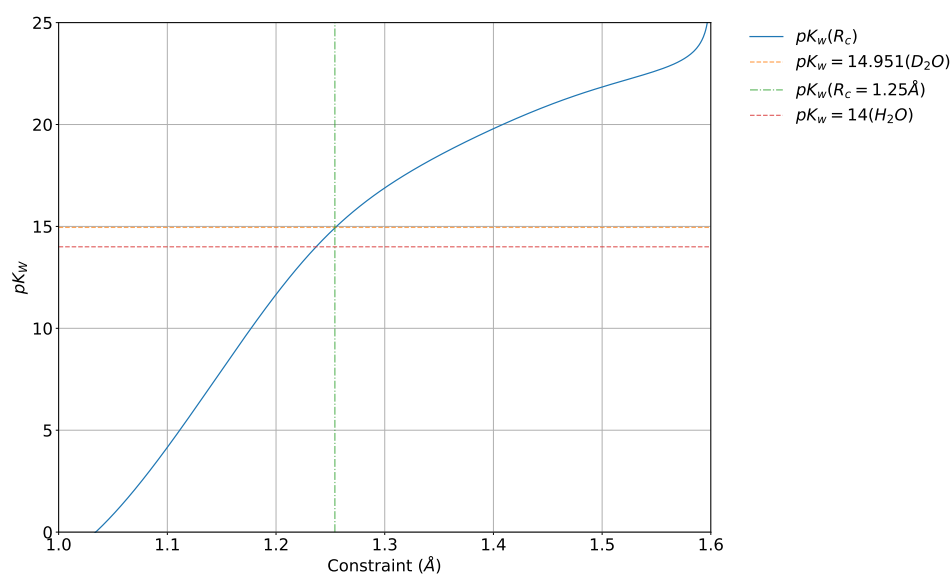

**Figure S 19.** Determination of  $R_c$  from the simulation of water, by fitting to the experimental value of  $D_2O$  in box with a side length of 19.7340 Å.

#### 4. Probabilistic $pK_a$ - dependence on $R_c$

**Table S 1.** All results presented here are calculated at 320 K, for a cubic box with a side length of 15.6406 Å, over a trajectory of about 20 ps (where the first 5 ps were not included in the evaluation). The  $pK_a$  values were calculated using the probabilistic method for different values of  $R_c$ . The '\*' indicates the that  $R_c$  value determined was determined from clean water using the same settings.

| Molecule                                                     | $pK_a$ (exp.) | 1.19 Å | 1.22 Å | 1.24* Å | 1.28 Å | 1.30 Å |
|--------------------------------------------------------------|---------------|--------|--------|---------|--------|--------|
| H <sub>2</sub> O                                             | 14.0          | -      | -      | -       | -      | -      |
| HCOOH                                                        | 3.8 [1]       | 3.8    | 4.1    | 4.2     | 4.4    | 4.5    |
| PhOH                                                         | 10.0 [1]      | 9.2    | 10.1   | 10.7    | 11.7   | 12.1   |
| [Ru(II)Py <sub>5</sub> Me(H <sub>2</sub> O)] <sup>2+</sup>   | ~11[2]        | 9.0    | 10.4   | 11.2    | 12.8   | 13.4   |
| [Ru(II)Py <sub>5</sub> OMe(H <sub>2</sub> O)] <sup>2+</sup>  | ~11[2]        | 9.0    | 10.3   | 11.1    | 12.3   | 12.8   |
| [Ru(III)Py <sub>5</sub> OMe(H <sub>2</sub> O)] <sup>3+</sup> | ~2.5[2]       | 4.3    | 4.4    | 4.5     | 4.6    | 4.7    |

**Table S 2.** All results presented here are calculated at 320 K, for a cubic box with a side length of 19.7340 Å, over a trajectory of about 20 ps (where the first 5 ps were not included in the evaluation). The  $pK_a$  values were calculated using the probabilistic method for different values of  $R_c$ . The '\*' indicates the that  $R_c$  value determined was determined from clean water using the same settings.

| Molecule                                                     | $pK_a$ (exp.) | 1.22 Å | 1.24* Å | 1.28 Å | 1.30 Å |
|--------------------------------------------------------------|---------------|--------|---------|--------|--------|
| H <sub>2</sub> O                                             | 14.0          | -      | -       | -      | -      |
| [Ru(II)Py <sub>5</sub> OMe(H <sub>2</sub> O)] <sup>2+</sup>  | ~11[2]        | 11.9   | 12.7    | 14.0   | 14.6   |
| [Ru(III)Py <sub>5</sub> OMe(H <sub>2</sub> O)] <sup>3+</sup> | ~2.5[2]       | 4.2    | 4.3     | 4.5    | 4.6    |

#### 5. Absolute $pK_a$ - convergence

The value for the absolute  $pK_a$  converges quickly to a constant value, however there is no guarantee that the dissociated state (i.e. A-H = 1.6 Å) is always the same (reprotonation, proton hopping).

**Table S 3.** Absolute  $pK_a$  calculated at 320 K, for a cubic box with a side length of 15.6406 Å and a cutoff a cutoff  $R_c = 1.24$  Å, increasing the equilibration time (ps) - total length of all trajectories is about 20 ps minus the equilibration time.

| equilibration time                                           | 2.5 ps | 5 ps | 7.5 ps | 10 ps | 12.5 ps |
|--------------------------------------------------------------|--------|------|--------|-------|---------|
| HCOOH                                                        | 2.7    | 2.7  | 2.7    | 2.3   | 1.9     |
| PhOH                                                         | 8.8    | 8.7  | 8.7    | 8.8   | 8.6     |
| [Ru(II)Py <sub>5</sub> Me(H <sub>2</sub> O)] <sup>2+</sup>   | 9.7    | 9.8  | 9.9    | 10.0  | 10.1    |
| [Ru(II)Py <sub>5</sub> OMe(H <sub>2</sub> O)] <sup>2+</sup>  | 9.4    | 9.4  | 9.4    | 9.4   | 9.6     |
| [Ru(III)Py <sub>5</sub> OMe(H <sub>2</sub> O)] <sup>3+</sup> | 3.0    | 3.1  | 3.3    | 3.5   | 3.4     |

#### 6. Probabilistic $pK_a$ - convergence

The value for the probabilistic  $pK_a$  requires more steps to converge, in particular for the highly charged system.

**Table S 4.** probabilistic  $pK_a$  calculated at 320 K, for a cubic box with a side length of 15.6406 Å and a cutoff  $R_c = 1.24$  Å, increasing the equilibration time (ps) - total length of all trajectories is about 20 ps minus the equilibration time.

| equilibration time                                           | 2.5 ps | 5 ps | 7.5 ps | 10 ps | 12.5 ps |
|--------------------------------------------------------------|--------|------|--------|-------|---------|
| HCOOH                                                        | 4.1    | 4.2  | 4.2    | 3.9   | 3.4     |
| PhOH                                                         | 11.0   | 10.7 | 10.6   | 10.7  | 10.5    |
| [Ru(II)Py <sub>5</sub> Me(H <sub>2</sub> O)] <sup>2+</sup>   | 11.0   | 11.2 | 11.5   | 11.7  | 11.6    |
| [Ru(II)Py <sub>5</sub> OMe(H <sub>2</sub> O)] <sup>2+</sup>  | 11.1   | 11.1 | 11.3   | 11.4  | 11.5    |
| [Ru(III)Py <sub>5</sub> OMe(H <sub>2</sub> O)] <sup>3+</sup> | 4.4    | 4.5  | 4.8    | 5.1   | 4.7     |

## 12 7. Relative $pK_a$ - convergence

**Table S 5.** Relative  $pK_a$  calculated at 320 K, for a cubic box with a side length of 15.6406 Å and a cutoff  $R_c = 1.24$  Å, increasing the equilibration time (ps) - total length of all trajectories is about 20 ps minus the equilibration time.

| equilibration time                                           | 2.5 ps | 5 ps | 7.5 ps | 10 ps | 12.5 ps |
|--------------------------------------------------------------|--------|------|--------|-------|---------|
| HCOOH                                                        | 6.7    | 6.8  | 6.6    | 6.4   | 6.0     |
| PhOH                                                         | 12.6   | 12.6 | 12.6   | 12.8  | 12.5    |
| [Ru(II)Py <sub>5</sub> Me(H <sub>2</sub> O)] <sup>2+</sup>   | 13.5   | 13.7 | 13.8   | 13.9  | 14.0    |
| [Ru(II)Py <sub>5</sub> OMe(H <sub>2</sub> O)] <sup>2+</sup>  | 13.3   | 13.3 | 13.3   | 13.4  | 13.5    |
| [Ru(III)Py <sub>5</sub> OMe(H <sub>2</sub> O)] <sup>3+</sup> | 6.9    | 7.1  | 7.3    | 7.5   | 7.4     |

## 13 8. Relative $pK_a$ - reduced constraint

**Table S 6.** Relative  $pK_a$  calculated at 320 K, for a cubic box with a side length of 15.6406 Å and a cutoff  $R_c = 1.24$  Å, where only constraints within 0.9 to 1.4 Å were considered for the water reference.

| molecule                                                     | $pK_a$ |
|--------------------------------------------------------------|--------|
| HCOOH                                                        | 5.8    |
| PhOH                                                         | 11.8   |
| [Ru(II)Py <sub>5</sub> Me(H <sub>2</sub> O)] <sup>2+</sup>   | 12.0   |
| [Ru(II)Py <sub>5</sub> OMe(H <sub>2</sub> O)] <sup>2+</sup>  | 12.3   |
| [Ru(III)Py <sub>5</sub> OMe(H <sub>2</sub> O)] <sup>3+</sup> | 6.2    |

## 14 9. Implications of using D<sub>2</sub>O

### 15 Absolute $pK_a$

16 If the  $pK_a$  values are considered to be  $pK_a^D$  values due to the use of molecular mass of deuterium,  
 17 then the absolute  $pK_a$  values have to be corrected according to the linear relation discussed in the MS.  
 18 Applying those conversion factors lowers all  $pK_a$  values and leads in most cases to a worse agreement  
 19 with the experiment.

**Table S 7.** All results presented here are calculated at 320 K, for a cubic box with side length of 15.6406 Å, over a trajectory of about 20 ps (where the first 5 ps were not included in the evaluation). The  $pK_a^D$  obtained using the absolute method were converted to  $pK_a^H$  values according to Equation 10 [a], respectively Equation 13 [b] in the MS.

| Molecule                                                     | $pK_a$ (exp.) | $pK_a^D$ | $pK_a^H[a]$ | $pK_a^H[b]$ |
|--------------------------------------------------------------|---------------|----------|-------------|-------------|
| H <sub>2</sub> O                                             | 14.0          | -        | -           | -           |
| HCOOH                                                        | 3.8 [1]       | 2.7      | 2.3         | 2.6         |
| PhOH                                                         | 10.0 [1]      | 8.7      | 8.0         | 8.1         |
| [Ru(II)Py <sub>5</sub> Me(H <sub>2</sub> O)] <sup>2+</sup>   | ~11 [2]       | 9.8      | 9.1         | 9.2         |
| [Ru(II)Py <sub>5</sub> OMe(H <sub>2</sub> O)] <sup>2+</sup>  | ~11 [2]       | 9.3      | 8.6         | 8.7         |
| [Ru(III)Py <sub>5</sub> OMe(H <sub>2</sub> O)] <sup>3+</sup> | ~2.5 [2]      | 3.1      | 2.7         | 2.9         |

**Table S 8.** All results presented here are calculated at 320 K, for a cubic box with side length of 19.7340 Å, over a trajectory of about 20 ps (where the first 5 ps were not included in the evaluation). The  $pK_a^D$  obtained using the absolute method were converted to  $pK_a^H$  values according to Equation 10 [a], respectively Equation 13 [b] in the MS.

| Molecule                                                     | $pK_a$ (exp.) | $pK_a^D$ | $pK_a^H[a]$ | $pK_a^H[b]$ |
|--------------------------------------------------------------|---------------|----------|-------------|-------------|
| H <sub>2</sub> O                                             | 14.0          | -        | -           | -           |
| [Ru(II)Py <sub>5</sub> OMe(H <sub>2</sub> O)] <sup>2+</sup>  | ~11 [2]       | 10.1     | 9.4         | 9.4         |
| [Ru(III)Py <sub>5</sub> OMe(H <sub>2</sub> O)] <sup>3+</sup> | ~2.5 [2]      | 3.1      | 2.7         | 2.9         |

## 20 Relative $pK_a$

21 As for the probabilistic  $pK_a$  values the  $pK_a$  of D<sub>2</sub>O had to be considered for the calculation of  
 22 the relative  $pK_a$  values. The comparison of  $pK_a^H$  values obtained by converting  $pK_a^D$  values with  $pK_a^H$   
 23 obtained by referencing to H<sub>2</sub>O revealed an overall reduction of the  $pK_a$  values by more than 1 unit.  
 24 As a consequence there is a better agreement for basic compounds.

**Table S 9.** All results presented here are calculated at 320 K, for a cubic box with side length of 15.6406 Å, over a trajectory of about 20 ps (where the first 5 ps were not included in the evaluation). All  $pK_a$  values were obtained using the relative method. The  $pK_a^H[a]$  values were calculated relative to H<sub>2</sub>O, while  $pK_a^D$  were calculated relative to D<sub>2</sub>O. The latter were converted into  $pK_a^H$  values according to Equation 10 [a], respectively Equation 13 [b] in the MS.

| Molecule                                                     | $pK_a$ (exp.) | $pK_a^H[a]$ | $pK_a^D$ | $pK_a^H[b]$ | $pK_a^H[c]$ |
|--------------------------------------------------------------|---------------|-------------|----------|-------------|-------------|
| H <sub>2</sub> O                                             | 14.0          | -           | -        | -           | -           |
| HCOOH                                                        | 3.8 [1]       | 6.7         | 5.7      | 5.2         | 5.5         |
| PhOH                                                         | 10.0 [1]      | 12.5        | 11.5     | 10.8        | 10.8        |
| [Ru(II)Py <sub>5</sub> Me(H <sub>2</sub> O)] <sup>2+</sup>   | ~11 [2]       | 13.7        | 12.7     | 11.9        | 11.9        |
| [Ru(II)Py <sub>5</sub> OMe(H <sub>2</sub> O)] <sup>2+</sup>  | ~11 [2]       | 13.3        | 12.3     | 11.5        | 11.5        |
| [Ru(III)Py <sub>5</sub> OMe(H <sub>2</sub> O)] <sup>3+</sup> | ~2.5 [2]      | 7.1         | 6.1      | 5.6         | 5.8         |

**Table S 10.** All results presented here are calculated at 320 K, for a cubic box with side length of 19.7340 Å, over a trajectory of about 20 ps (where the first 5 ps were not included in the evaluation). All  $pK_a$  values were obtained using the relative method. The  $pK_a^H[a]$  values were calculated relative to H<sub>2</sub>O, while  $pK_a^D$  were calculated relative to D<sub>2</sub>O. The latter were converted into  $pK_a^H$  values according to Equation 10 [a], respectively Equation 13 [b] in the MS.

| Molecule                                                     | $pK_a$ (exp.) | $pK_a^H[a]$ | $pK_a^D$ | $pK_a^H[b]$ | $pK_a^H[c]$ |
|--------------------------------------------------------------|---------------|-------------|----------|-------------|-------------|
| H <sub>2</sub> O                                             | 14.0          | -           | -        | -           | -           |
| [Ru(II)Py <sub>5</sub> OMe(H <sub>2</sub> O)] <sup>2+</sup>  | ~11 [2]       | 11.5        | 10.6     | 9.9         | 9.9         |
| [Ru(III)Py <sub>5</sub> OMe(H <sub>2</sub> O)] <sup>3+</sup> | ~2.5 [2]      | 4.6         | 3.7      | 3.3         | 3.5         |

## 10. Overview simulation time

**Table S 11.** Number of simulation steps per model system / constraint for a cubic box with a side length of 15.6406 Å. Each time step corresponds to 0.5 fs.

| d(A–H) | H <sub>2</sub> O | PhOH  | HCOOH | Ru(II)Py <sub>5</sub> Me | Ru(II)Py <sub>5</sub> OMe | Ru(III)Py <sub>5</sub> OMe |
|--------|------------------|-------|-------|--------------------------|---------------------------|----------------------------|
| 0.9Å   | 30529            | 38380 | 39245 | 39731                    | 40735                     | 43373                      |
| 1.0Å   | 45516            | 37244 | 40913 | 38672                    | 40224                     | 43360                      |
| 1.1Å   | 44861            | 40056 | 40233 | 48999                    | 40268                     | 37874                      |
| 1.2Å   | 44386            | 33873 | 39109 | 53620                    | 41574                     | 43101                      |
| 1.3Å   | 40309            | 36914 | 40913 | 54654                    | 40162                     | 43778                      |
| 1.4Å   | 39632            | 32981 | 40205 | 39987                    | 39384                     | 42555                      |
| 1.5Å   | 39871            | 37802 | 40188 | 40797                    | 38697                     | 41321                      |
| 1.6Å   | 39340            | 39260 | 40112 | 40368                    | 38732                     | 42472                      |

**Table S 12.** Number of simulation steps per model system / constraint for a cubic box with a side length of 19.7340 Å. Each time step corresponds to 0.5 fs.

| d(A–H) | H <sub>2</sub> O | Ru(II)Py <sub>5</sub> OMe | Ru(III)Py <sub>5</sub> OMe |
|--------|------------------|---------------------------|----------------------------|
| 0.9Å   | 33538            | 32542                     | 33592                      |
| 1.0Å   | 34498            | 31453                     | 33905                      |
| 1.1Å   | 28697            | 31082                     | 28762                      |
| 1.2Å   | 31662            | 31161                     | 32810                      |
| 1.3Å   | 29924            | 31933                     | 33278                      |
| 1.4Å   | 30428            | 31864                     | 32835                      |
| 1.5Å   | 30556            | 31575                     | 32175                      |
| 1.6Å   | 26253            | 30264                     | 33664                      |

## 11. References

1. A., B.E.; Nachod, F.C. *Determination of Organic Structures by Physical Methods*; Vol. 1, Academic Press., Inc., 1955.
2. Gil-Sepulcre, M.; Axelson, J.C.; Aguiló, J.; Solà-Hernández, L.; Francàs, L.; Poater, A.; Blancafort, L.; Benet-Buchholz, J.; Guirado, G.; Escriche, L.; Llobet, A.; Bofill, R.; Sala, X. Synthesis and Isomeric Analysis of Ru(II) Complexes Bearing Pentadentate Scaffolds. *Inorg. Chem.* **2016**, *55*, 11216–11229. doi:10.1021/acs.inorgchem.6b01755.

© 2019 by the authors. Submitted to *Inorganics* for possible open access publication under the terms and conditions of the Creative Commons Attribution (CC BY) license (<http://creativecommons.org/licenses/by/4.0/>).
